# Supplementary material for: Parity predisposes breasts to the oncogenic action of PAPP-A and activation of the collagen receptor DDR2
Source: Springer Nature journal article supplement (doi:10.1186/s13058-019-1142-z), 2019-05-02

# Supplemental Figure 2

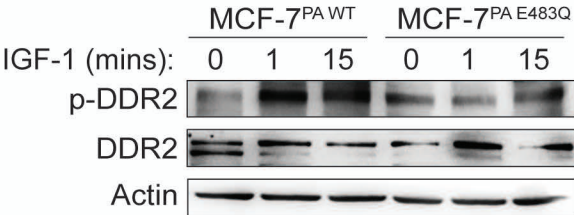

Supplement: MOESM2 [file 16692118]
