# Supplementary material for: Parity predisposes breasts to the oncogenic action of PAPP-A and activation of the collagen receptor DDR2
Source: Springer Nature journal article supplement (doi:10.1186/s13058-019-1142-z), 2019-05-02

# Supplemental Figure 3

|               | MCF-7 |   |   |   |   | MCF-7 <sup>PAPP-A</sup> |   |   |   |   |
|---------------|-------|---|---|---|---|-------------------------|---|---|---|---|
| Imatinib 4uM: | -     | - | + | - | + | -                       | - | + | - | + |
| PQ401 12uM:   | -     | + | - | - | - | -                       | + | - | - | - |
| PQ401 7.5uM:  | -     | - | - | + | + | -                       | - | - | + | + |

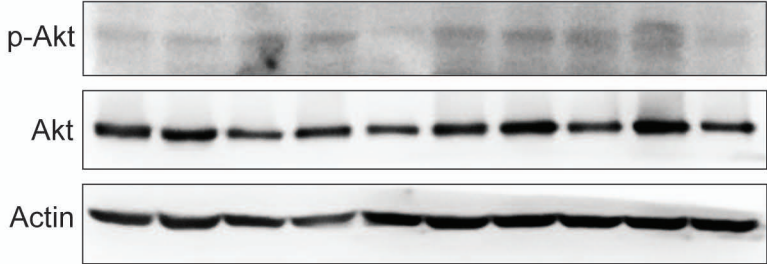

Supplement: MOESM3 [file 16692118]
