# Supplementary material for: Parity predisposes breasts to the oncogenic action of PAPP-A and activation of the collagen receptor DDR2
Source: Springer Nature journal article supplement (doi:10.1186/s13058-019-1142-z), 2019-05-02
Supplement: MOESM4 [file 16692118]

# Supplemental Figure 4

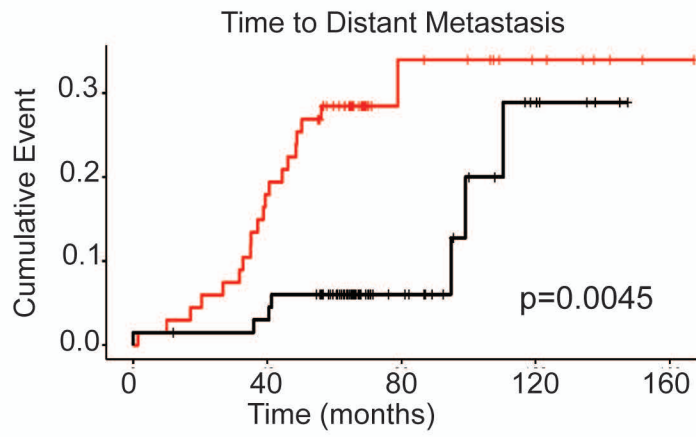

|        |   | Numbers at risk |    |    |     |     |
|--------|---|-----------------|----|----|-----|-----|
|        |   | 0               | 40 | 80 | 120 | 160 |
| Strata | + | 67              | 64 | 21 | 6   | 0   |
|        | + | 67              | 55 | 12 | 6   | 1   |
|        |   | 0               | 40 | 80 | 120 | 160 |

Time (months)

+

*PAPP-A/Snai1/Col1a1* Low

+

*PAPP-A/Snai1/Col1a1* High
